# Supplementary material for: Low-coverage sequencing: Implications for design of complex trait association studies
Source: HighWire-hosted journal article supplement (doi:10.1101/gr.117259.110), 2011-04-01

Genotype Accuracy Using Our Method

Depth = 2X

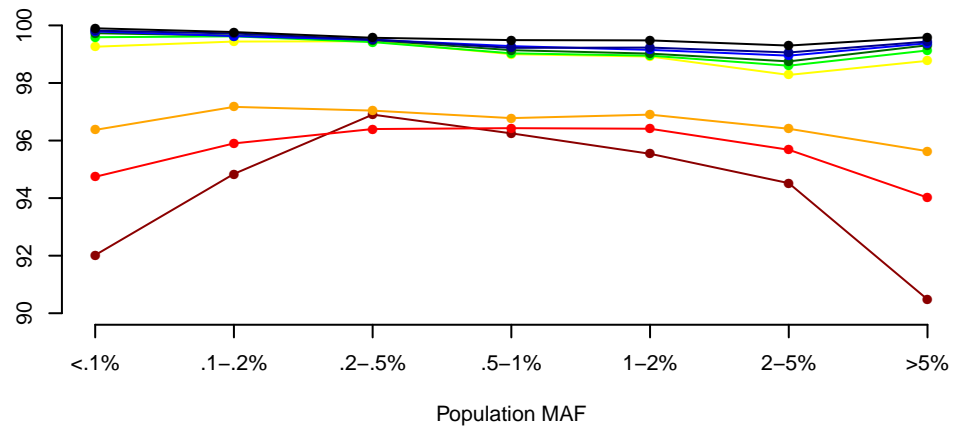

Genotype Accuracy Using Strawman

Depth = 2X

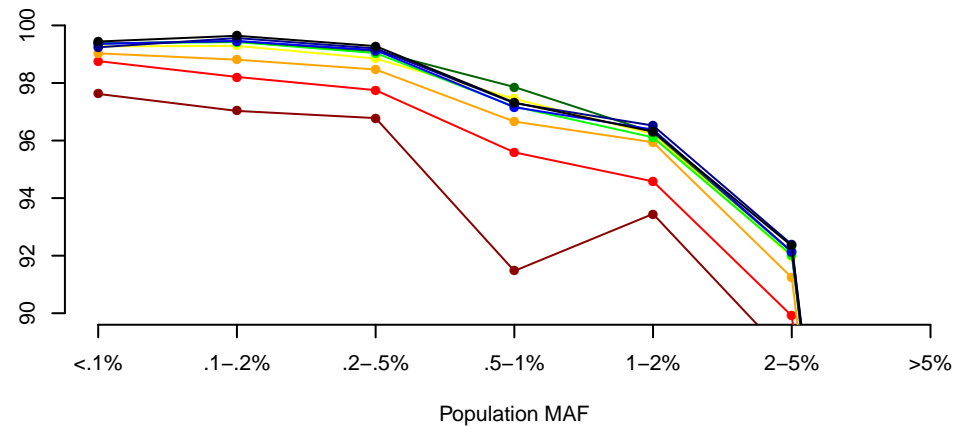

Genotype Accuracy Using Our Method

Depth = 4X

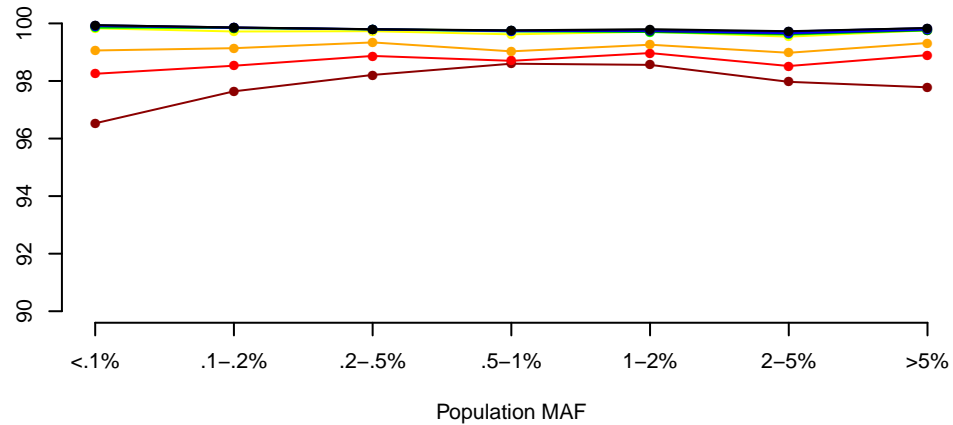

Genotype Accuracy Using Strawman

Depth = 4X

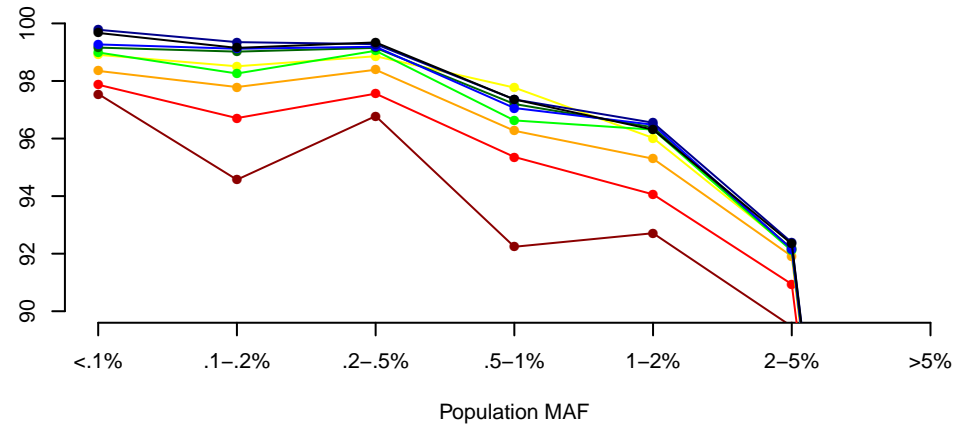

Genotype Accuracy Using Our Method

Depth = 6X

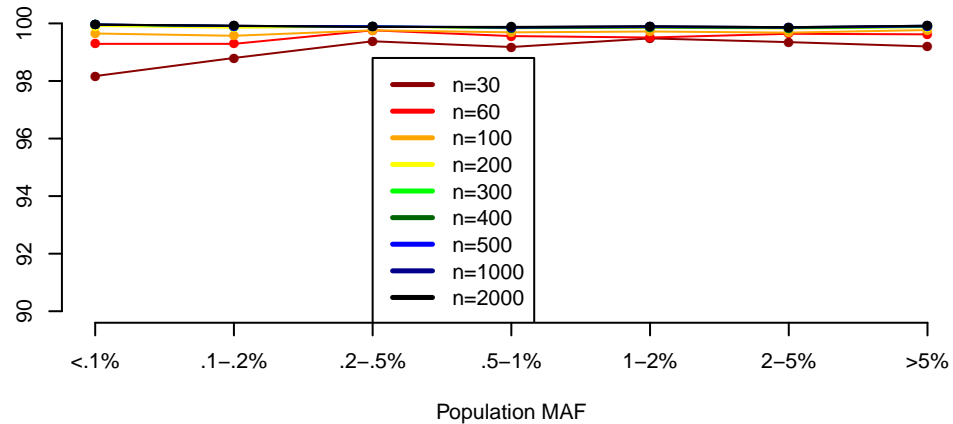

Genotype Accuracy Using Strawman

Depth = 6X

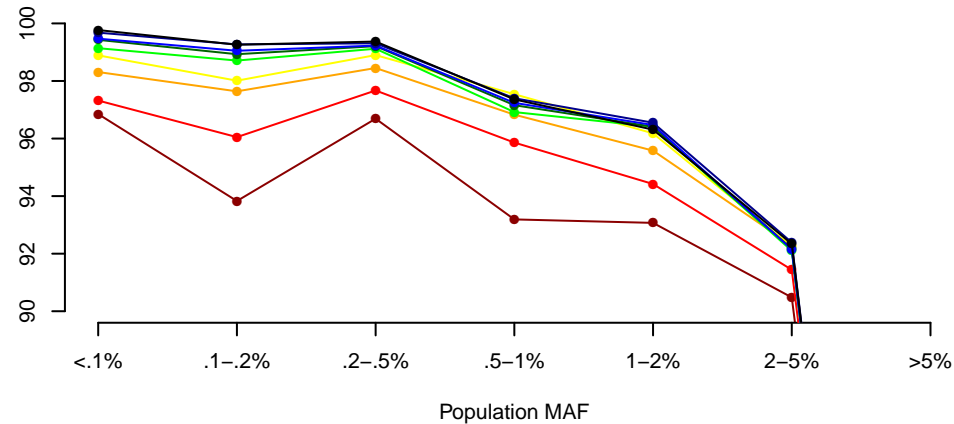

Supplement: SF1.pdf [file SF1.pdf]
