# Supplementary figures and images for: Low-coverage sequencing: Implications for design of complex trait association studies
Source: HighWire-hosted journal article supplement (doi:10.1101/gr.117259.110), 2011-04-01

Supplementary Figure 4

Depth = 2X

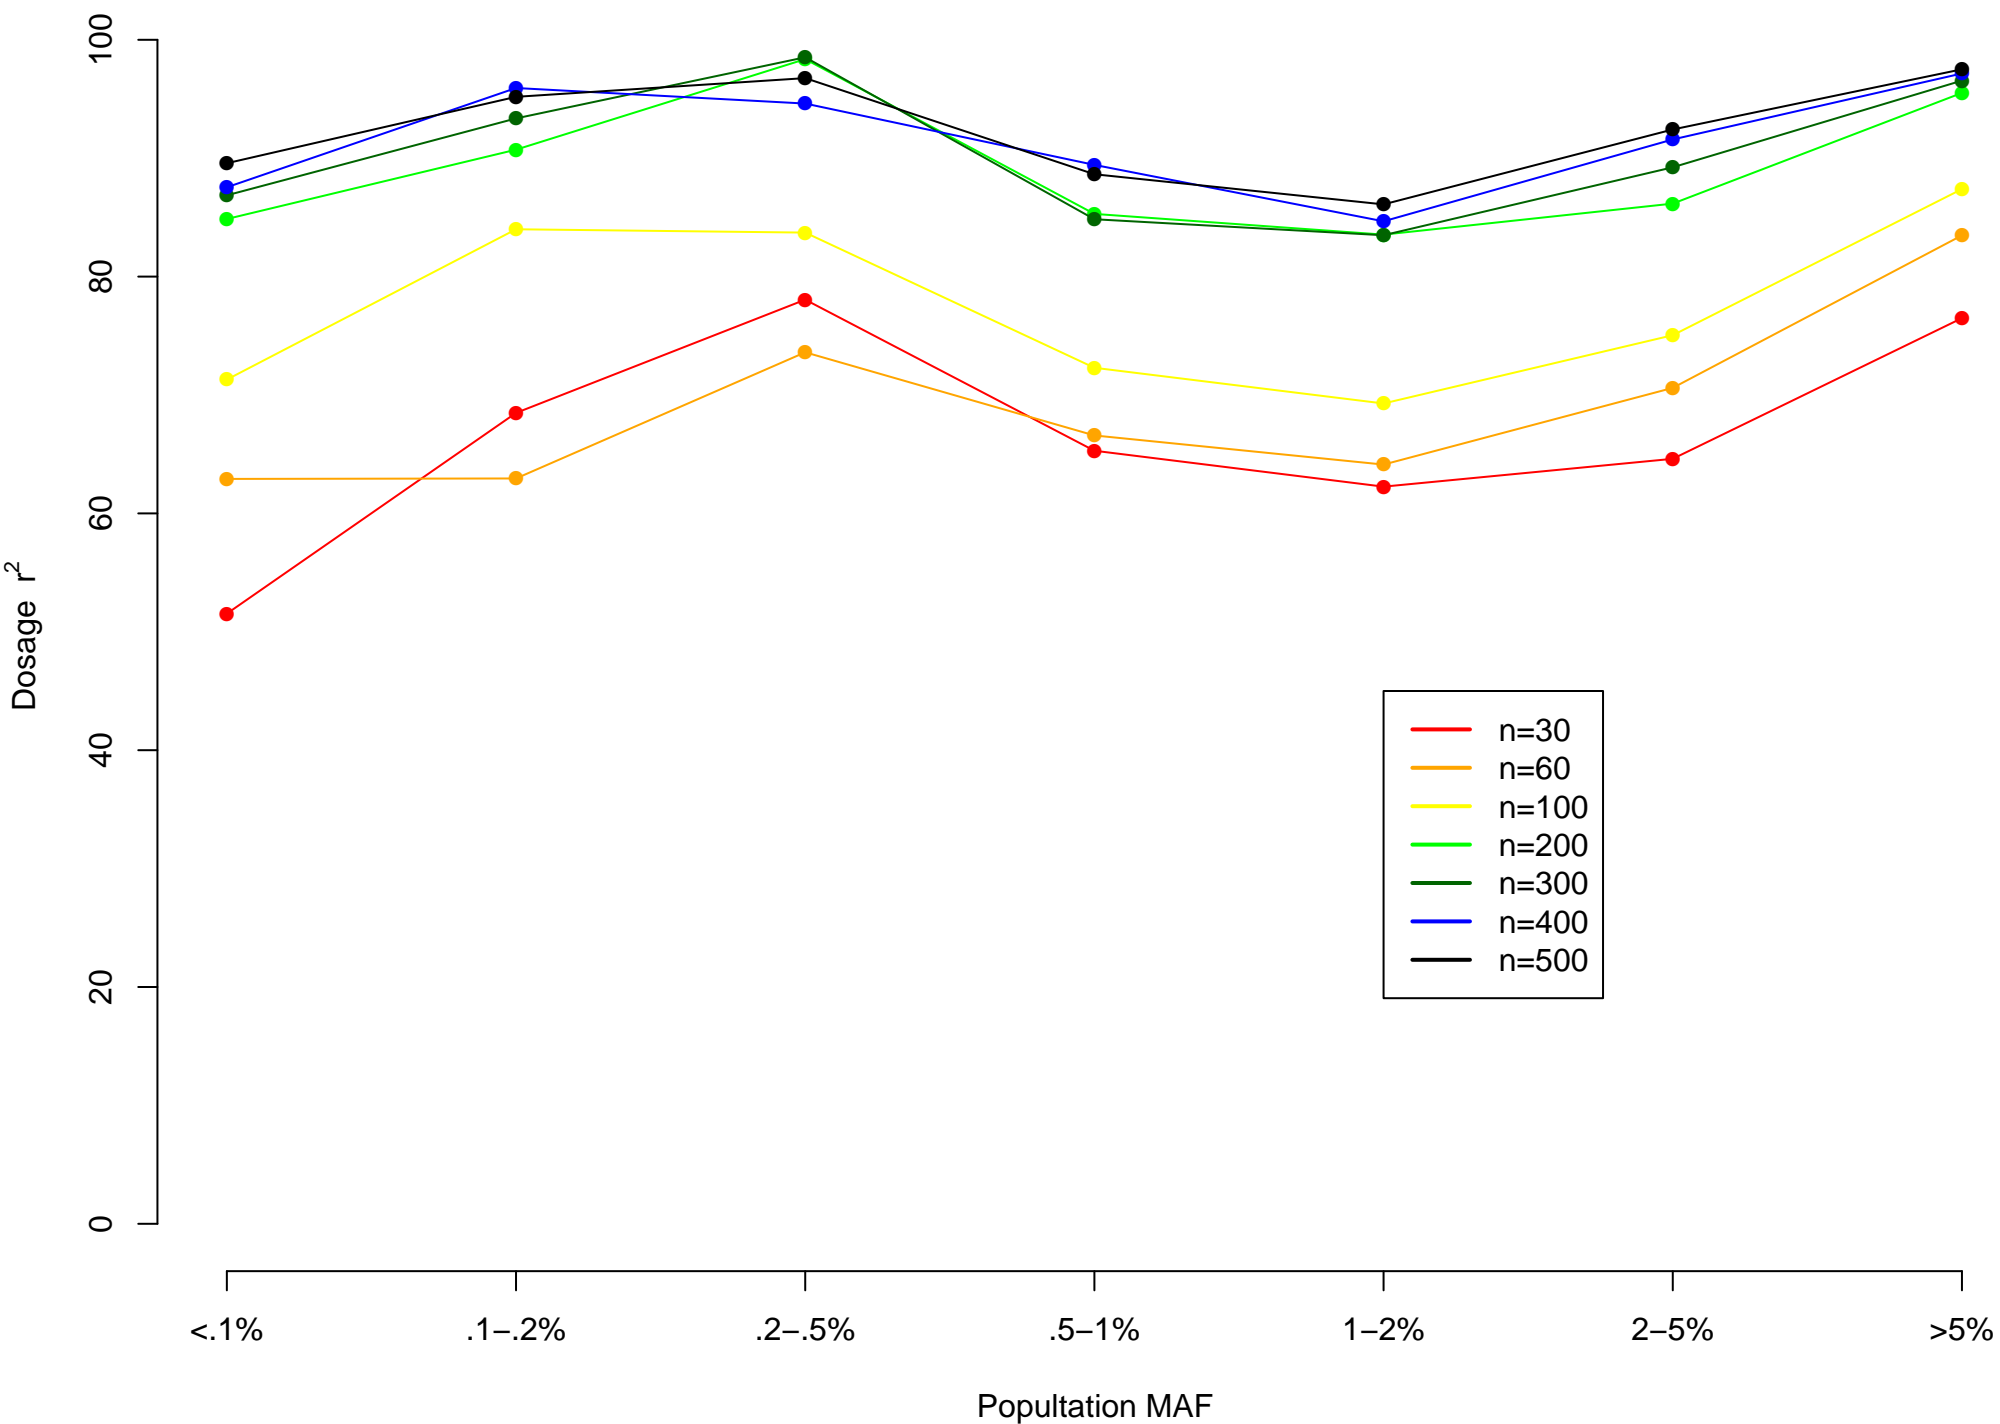

Supplement: SF4.pdf [file SF4.pdf]
